# Supplementary material for: Multimodel Ensemble Projections of Wave Climate in the Western North Pacific Using CMIP6 Marine Surface Winds
Source: MDPI journal article supplement (doi:10.3390/jmse9080835), 2021-07-31
Supplement: s1 [file s1]

Archive with 1 entries (1 files):
- jmse-1276860-supplementary.pdf
